# Supplementary material for: Targeting CCL2/CCR2 Signaling Overcomes MEK Inhibitor Resistance in Acute Myeloid Leukemia
Source: PubMed Central journal article supplement — Clin Cancer Res. 2024 Mar 7;30(10):2245–59. doi: 10.1158/1078-0432.CCR-23-2654 (PMC11094423; doi:10.1158/1078-0432.ccr-23-2654), 2024-03-07
Supplement: ccr-23-2654_star_table_1_supptr1.pdf [file ccr-23-2654_star_table_1_supptr1.pdf]

CCR-23-2654R1\_SciScore\_STAR\_Table

|                                        |  |                                                                        |
|----------------------------------------|--|------------------------------------------------------------------------|
| <b>Antibodies</b>                      |  |                                                                        |
| <b>CCL2</b>                            |  | Suggestion: (Thermo Fisher Scientific Cat# MA5-17040, RRID:AB_2538512) |
| <b>CCR2</b>                            |  | Suggestion: (Cell Signaling Technology Cat# 12199, RRID:AB_2797844)    |
| <b>Experimental Models: Cell Lines</b> |  |                                                                        |
| <b>MOLM13</b>                          |  | Suggestion: DSMZ Cat# ACC-554, RRID:CVCL_2119                          |
| <b>OCI-AML2</b>                        |  | Suggestion: BCRJ Cat# 0383, RRID:CVCL_1619                             |
| <b>HEK 293T</b>                        |  | Suggestion: KCB Cat# KCB 200744YJ, RRID:CVCL_0063                      |
| <b>Recombinant DNA</b>                 |  |                                                                        |
| <b>VSV-G</b>                           |  | Suggestion: RRID:Addgene_138479                                        |
| <b>psPAX2</b>                          |  | Suggestion: RRID:Addgene_12260                                         |
| <b>Software and Algorithms</b>         |  |                                                                        |
| <b>EnrichmentMap</b>                   |  | Suggestion: (EnrichmentMap, RRID:SCR_016052)                           |
| <b>Bowtie2</b>                         |  | Suggestion: (Bowtie 2, RRID:SCR_016368)                                |
| <b>FlowJo</b>                          |  | Suggestion: (FlowJo, RRID:SCR_008520)                                  |
